# Supplementary material
Source: publisher site journal article supplement (https://www.dovepress.com/article/416770)
Supplement: Supplementary file 1 [file get_supplementary_file.php]

**Supplementary materials**

**Comparative genomic analysis of hypervirulence carbapenem-resistant Klebsiella pneumoniae from inpatients with infection and gut colonization, China**

**Supplementary tables**

**Table S1.** The Assembly number of published genomes of hypervirulent carbapenem-resistant *Klebsiella pneumoniae* downloaded from NCBI in this study.

**Table S2.** Characteristics and logistic regression analysis of hypervirulent carbapenem-resistant *Klebsiella pneumoniae* isolated from fecal samples of hospitalized patients.

**Table S3.** Antimicrobial susceptibility profiles of 46 hypervirulent carbapenem-resistant *Klebsiella pneumoniae* isolated from fecal samples of hospitalized patients.

**Table S4.** Univariate analysis of accessory genomes of gut colonized and pathogenic populations of hypervirulent carbapenem-resistant *Klebsiella pneumoniae.*

Table S1. The Assembly number of published genomes of hypervirulent carbapenem-resistant *Klebsiella pneumoniae* downloaded from NCBI in this study.

| **sources** | **accession number** |
| --- | --- |
| **Infection Samples** | GCA_002264195.1 GCA_002264785.1 GCA_002264795.1 GCA_002264845.1 GCA_002264925.1 |
|  | GCA_002740615.1 GCA_002740625.1 GCA_002740645.1 GCA_003402995.1 GCA_003410395.1 |
|  | GCA_003666705.1 GCA_003666725.1 GCA_003666735.1 GCA_003666765.1 GCA_003666785.1 |
|  | GCA_003666795.1 GCA_003666825.1 GCA_003666835.1 GCA_003666845.1 GCA_003932915.1 |
|  | GCA_004332095.1 GCA_006130105.1 GCA_006130515.1 GCA_006131335.1 GCA_006131345.1 |
|  | GCA_007115145.1 GCA_007115395.1 GCA_007115435.1 GCA_007115465.1 GCA_007115475.1 |
|  | GCA_007115485.1 GCA_007115515.1 GCA_007115565.1 GCA_007997565.1 GCA_007997605.1 |
|  | GCA_007997655.1 GCA_007997665.1 GCA_007997675.1 GCA_007997705.1 GCA_007997745.1 |
|  | GCA_007997755.1 GCA_007997765.1 GCA_007997795.1 GCA_007997815.1 GCA_007997885.1 |
|  | GCA_008634555.1 GCA_008634595.1 GCA_008634675.1 GCA_008634715.1 GCA_008634795.1 |
|  | GCA_008728695.1 GCA_008867305.1 GCA_008867505.1 GCA_009721355.1 GCA_009721445.1 |
|  | GCA_009721455.1 GCA_009721485.1 GCA_009721495.1 GCA_009721505.1 GCA_009721545.1 |
|  | GCA_009721555.1 GCA_009721685.1 GCA_009721705.1 GCA_009721725.1 GCA_009721735.1 |
|  | GCA_009721785.1 GCA_009721805.1 GCA_009721825.1 GCA_009721835.1 GCA_009721875.1 |
|  | GCA_009721885.1 GCA_009721925.1 GCA_009721945.1 GCA_009721965.1 GCA_009721975.1 |
|  | GCA_009722005.1 GCA_009722025.1 GCA_009722035.1 GCA_009722045.1 GCA_009722055.1 |
|  | GCA_009722105.1 GCA_009722125.1 GCA_009722135.1 GCA_009722145.1 GCA_009722165.1 |
|  | GCA_009722205.1 GCA_009722215.1 GCA_009722225.1 GCA_009722265.1 GCA_009722285.1 |
|  | GCA_009722305.1 GCA_009722315.1 GCA_009722335.1 GCA_009722365.1 GCA_009722385.1 |
|  | GCA_009722425.1 GCA_009722515.1 GCA_009722535.1 GCA_009722585.1 GCA_009723315.1 |
|  | GCA_009723345.1 GCA_009723505.1 GCA_009723605.1 GCA_009723615.1 GCA_009723625.1 |
|  | GCA_009723645.1 GCA_009723685.1 GCA_009723745.1 GCA_009723765.1 GCA_009723875.1 |
|  | GCA_009723905.1 GCA_009723935.1 GCA_009723965.1 GCA_009723975.1 GCA_009723985.1 |
|  | GCA_009724025.1 GCA_009724035.1 GCA_009724065.1 GCA_009724075.1 GCA_009724085.1 |
|  | GCA_009724265.1 GCA_009724285.1 GCA_009724305.1 GCA_009724365.1 GCA_009724385.1 |
|  | GCA_009724395.1 GCA_009724565.1 GCA_009724585.1 GCA_009724595.1 GCA_009811915.1 |
|  | GCA_009811925.1 GCA_009811945.1 GCA_009811995.1 GCA_009812025.1 GCA_009834285.1 |
|  | GCA_009896515.1 GCA_013348885.1 GCA_013348925.1 GCA_013348945.1 GCA_013348965.1 |
|  | GCA_013349045.1 GCA_013349085.1 GCA_015290985.1 GCA_016679905.1 GCA_016680195.1 |
|  | GCA_016680715.1 GCA_016722885.1 GCA_016748155.1 GCA_016748215.1 GCA_016748235.1 |
|  | GCA_016748285.1 GCA_016748295.1 GCA_016748375.1 GCA_016748455.1 GCA_016748475.1 |
|  | GCA_016748515.1 GCA_016748535.1 GCA_016748605.1 GCA_016748695.1 GCA_016748735.1 |
|  | GCA_016748835.1 GCA_016748845.1 GCA_016748955.1 GCA_016749055.1 GCA_016749145.1 |
|  | GCA_016749195.1 GCA_016749245.1 GCA_016749255.1 GCA_016749295.1 GCA_016749475.1 |
|  | GCA_016749485.1 GCA_016749555.1 GCA_016749635.1 GCA_016749695.1 GCA_016749795.1 |
|  | GCA_016749835.1 GCA_016749855.1 GCA_016749865.1 GCA_016749995.1 GCA_016750035.1 |
|  | GCA_016750055.1 GCA_016750115.1 GCA_016750175.1 GCA_016750235.1 GCA_016750275.1 |
|  | GCA_016750355.1 GCA_016750365.1 GCA_016750455.1 GCA_016750465.1 GCA_016750515.1 |
|  | GCA_016750535.1 GCA_016750555.1 GCA_016750575.1 GCA_016750595.1 GCA_016750615.1 |
|  | GCA_016750655.1 GCA_016750675.1 GCA_016750685.1 GCA_016750715.1 GCA_016750775.1 |
|  | GCA_016750815.1 GCA_016750835.1 GCA_016750875.1 GCA_016750905.1 GCA_016750995.1 |
|  | GCA_016751005.1 GCA_016751035.1 GCA_016751165.1 GCA_016751195.1 GCA_016751275.1 |
|  | GCA_016751355.1 GCA_016751375.1 GCA_016751395.1 GCA_016751415.1 GCA_016751475.1 |
|  | GCA_016751505.1 GCA_016751555.1 GCA_016751635.1 GCA_016751645.1 GCA_016751675.1 |
|  | GCA_016751705.1 GCA_016751775.1 GCA_016751795.1 GCA_016751815.1 GCA_016751835.1 |
|  | GCA_016751855.1 GCA_016751875.1 GCA_016751905.1 GCA_016751955.1 GCA_016751975.1 |
|  | GCA_016752005.1 GCA_016752025.1 GCA_016752095.1 GCA_016752155.1 GCA_016752175.1 |
|  | GCA_016752195.1 GCA_016752235.1 GCA_016752465.1 GCA_016752555.1 GCA_016752635.1 |
|  | GCA_016752665.1 GCA_016752695.1 GCA_016752785.1 GCA_016752855.1 GCA_016752895.1 |
|  | GCA_016752975.1 GCA_016752985.1 GCA_016753035.1 GCA_016753055.1 GCA_016753095.1 |
|  | GCA_016753135.1 GCA_016753215.1 GCA_016753255.1 GCA_016753315.1 GCA_016753365.1 |
|  | GCA_016753415.1 GCA_016753455.1 GCA_016753485.1 GCA_016753495.1 GCA_016753675.1 |
|  | GCA_016753695.1 GCA_016753755.1 GCA_016753765.1 GCA_016753815.1 GCA_016753835.1 |
|  | GCA_016753935.1 GCA_016753975.1 GCA_016754075.1 GCA_016754115.1 GCA_016754255.1 |
|  | GCA_016754305.1 GCA_016754335.1 GCA_016754375.1 GCA_016754415.1 GCA_016754435.1 |
|  | GCA_016754575.1 GCA_016754595.1 GCA_016754635.1 GCA_016754675.1 GCA_016754695.1 |
|  | GCA_016754715.1 GCA_016754735.1 GCA_016754745.1 GCA_016754775.1 GCA_016754795.1 |
|  | GCA_016754815.1 GCA_016754835.1 GCA_016754875.1 GCA_016754895.1 GCA_016754915.1 |
|  | GCA_016754925.1 GCA_016754955.1 GCA_016754995.1 GCA_016755055.1 GCA_016755075.1 |
|  | GCA_016755315.1 GCA_016757945.1 GCA_016757995.1 GCA_016758015.1 GCA_016774435.1 |
|  | GCA_016800965.1 GCA_016924055.1 GCA_016924175.1 GCA_016924215.1 GCA_017310305.1 |
|  | GCA_017310425.1 GCA_017311535.1 GCA_017311595.1 GCA_017311605.1 GCA_017311635.1 |
|  | GCA_017311645.1 GCA_017311915.1 GCA_017311935.1 GCA_017311955.1 GCA_017311975.1 |
|  | GCA_017311995.1 GCA_017809835.1 GCA_018336835.1 GCA_019050535.1 GCA_019050575.1 |
|  | GCA_019051515.1 GCA_019053575.1 GCA_019054215.1 GCA_019054335.1 GCA_019054355.1 |
|  | GCA_019165775.1 GCA_019334545.1 GCA_019444195.1 GCA_020178655.1 GCA_020178695.1 |
|  | GCA_020178755.1 GCA_020178775.1 GCA_020178815.1 GCA_020178875.1 GCA_020178895.1 |
|  | GCA_020483165.1 GCA_020496635.1 GCA_020496675.1 GCA_020520185.1 GCA_021213885.1 |
|  | GCA_021398155.1 GCA_021398425.1 GCA_021442065.1 GCA_021456065.1 GCA_021456185.1 |
|  | GCA_021456345.1 GCA_021456405.1 GCA_021456425.1 GCA_021456445.1 GCA_021456485.1 |
|  | GCA_021456525.1 GCA_021456645.1 GCA_021456785.1 GCA_021456795.1 GCA_021456825.1 |
|  | GCA_021457005.1 GCA_021457025.1 GCA_021457065.1 GCA_021457145.1 GCA_021457345.1 |
|  | GCA_021457425.1 GCA_021457445.1 GCA_021457645.1 GCA_021457655.1 GCA_021457805.1 |
|  | GCA_021457985.1 GCA_021458065.1 GCA_021458185.1 GCA_021458205.1 GCA_021458305.1 |
|  | GCA_021458385.1 GCA_021458405.1 GCA_021458415.1 GCA_021458435.1 GCA_021458465.1 |
|  | GCA_021458485.1 GCA_021458525.1 GCA_021458545.1 GCA_021458605.1 GCA_021458625.1 |
|  | GCA_021497485.1 GCA_021516415.1 GCA_021516625.1 GCA_021516875.1 GCA_021516895.1 |
|  | GCA_021517115.1 GCA_021517175.1 GCA_021517215.1 GCA_021517255.1 GCA_021517645.1 |
|  | GCA_021517775.1 GCA_021517785.1 GCA_021517915.1 GCA_021518145.1 GCA_021518215.1 |
|  | GCA_021518345.1 GCA_021518375.1 GCA_021518815.1 GCA_021518875.1 GCA_021518905.1 |
|  | GCA_021519355.1 GCA_021519515.1 GCA_021519635.1 GCA_021519715.1 GCA_021519915.1 |
|  | GCA_021520015.1 GCA_021520475.1 GCA_021520545.1 GCA_021520845.1 GCA_021520875.1 |
|  | GCA_021521035.1 GCA_021521045.1 GCA_021521075.1 GCA_021521095.1 GCA_021521105.1 |
|  | GCA_021521135.1 GCA_021521145.1 GCA_021521175.1 GCA_021521235.1 GCA_021521275.1 |
|  | GCA_021530355.1 GCA_021530395.1 GCA_021530495.1 GCA_021530755.1 GCA_021530875.1 |
|  | GCA_021532295.1 GCA_021532325.1 GCA_021532435.1 GCA_021532675.1 GCA_021532735.1 |
|  | GCA_021532755.1 GCA_021560095.1 GCA_021698875.1 GCA_021726595.1 GCA_021726635.1 |
|  | GCA_021726695.1 GCA_021726705.1 GCA_021726755.1 GCA_021726795.1 GCA_021726855.1 |
|  | GCA_021726875.1 GCA_021726935.1 GCA_021726965.1 GCA_021727035.1 GCA_021727075.1 |
|  | GCA_021727115.1 GCA_021727185.1 GCA_021727215.1 GCA_021727235.1 GCA_021727245.1 |
|  | GCA_021727285.1 GCA_021727355.1 GCA_021727415.1 GCA_021727455.1 GCA_021727495.1 |
|  | GCA_021727515.1 GCA_021727635.1 GCA_021727655.1 GCA_021727715.1 GCA_021727775.1 |
|  | GCA_021727815.1 GCA_021727855.1 GCA_021727955.1 GCA_021871395.1 GCA_021898935.1 |
|  | GCA_021899055.1 GCA_021899095.1 GCA_021899115.1 GCA_021899135.1 GCA_021899175.1 |
|  | GCA_021899215.1 GCA_021899235.1 GCA_021899375.1 GCA_021899515.1 GCA_021899595.1 |
|  | GCA_021899655.1 GCA_021951445.1 GCA_021951485.1 GCA_021951565.1 GCA_021951805.1 |
|  | GCA_021952445.1 GCA_021953745.1 GCA_021953905.1 GCA_021954425.1 GCA_021954985.1 |
|  | GCA_021955065.1 GCA_021955445.1 GCA_021955545.1 GCA_021955565.1 GCA_021955605.1 |
|  | GCA_021955645.1 GCA_021955705.1 GCA_021956265.1 GCA_021956385.1 GCA_021957005.1 |
|  | GCA_021958245.1 GCA_021959305.1 GCA_021959325.1 GCA_021960965.1 GCA_021961945.1 |
|  | GCA_021962215.1 GCA_021962255.1 GCA_021962335.1 GCA_021962495.1 GCA_021962695.1 |
|  | GCA_021962945.1 GCA_021963185.1 GCA_021963225.1 GCA_021966295.1 GCA_021966455.1 |
|  | GCA_021966535.1 GCA_021966835.1 GCA_021966895.1 GCA_021966915.1 GCA_021967155.1 |
|  | GCA_021967275.1 GCA_021967375.1 GCA_021968905.1 GCA_021969175.1 GCA_021969235.1 |
|  | GCA_021969415.1 GCA_021969615.1 GCA_022011195.1 GCA_022011535.1 GCA_022019995.1 |
|  | GCA_022213425.1 GCA_022808205.1 GCA_022808395.1 GCA_022828555.1 GCA_022828575.1 |
|  | GCA_022982615.1 GCA_023156435.1 GCA_023243135.1 GCA_023243155.1 GCA_023243205.1 |
|  | GCA_023243275.1 GCA_023243295.1 GCA_023700525.1 GCA_023700565.1 GCA_023700605.1 |
|  | GCA_023700625.1 GCA_023739575.1 GCA_024357605.1 GCA_024446515.1 GCA_024582215.1 |
|  | GCA_024582235.1 GCA_024582255.1 GCA_024582275.1 GCA_024582295.1 GCA_024582315.1 |
|  | GCA_024582355.1 GCA_024706305.1 GCA_024706315.1 GCA_024706325.1 GCA_024706335.1 |
|  | GCA_024706385.1 GCA_024706425.1 GCA_024706485.1 GCA_024706805.1 GCA_024706835.1 |
|  | GCA_024762135.1 GCA_025073415.1 GCA_025583855.1 GCA_025583865.1 GCA_025677745.1 |
|  | GCA_025677765.1 GCA_025762435.1 GCA_025762455.1 GCA_025762465.1 GCA_025920085.1 |
|  | GCA_901001935.1 GCA_902649515.1 GCA_902649525.1 GCA_902649545.1 GCA_902649555.1 |
|  | GCA_902649575.1 GCA_902649605.1 GCA_902649615.1 GCA_902649635.1 GCA_902649645.1 |
|  | GCA_902649655.1 GCA_902649675.1 GCA_902649745.1 GCA_902649765.1 GCA_902649785.1 |
|  | GCA_902649805.1 GCA_902649815.1 GCA_902649875.1 GCA_902650125.1 GCA_902650215.1 |
|  | GCA_902650265.1 GCA_902650275.1 GCA_902650295.1 GCA_902650315.1 GCA_902650325.1 |
|  | GCA_902650335.1 GCA_902650355.1 GCA_902650385.1 GCA_902650435.1 GCA_902650455.1 |
|  | GCA_902650465.1 GCA_902650475.1 GCA_902650485.1 GCA_902650495.1 GCA_902650505.1 |
|  | GCA_902650515.1 GCA_902650525.1 GCA_902650535.1 GCA_902650545.1 GCA_902650555.1 |
|  | GCA_902650565.1 GCA_902650575.1 GCA_902650585.1 GCA_902650595.1 GCA_902650605.1 |
|  | GCA_902650625.1 GCA_902650635.1 GCA_902650645.1 GCA_902650655.1 GCA_902650665.1 |
|  | GCA_902650675.1 GCA_902650685.1 GCA_902650695.1 GCA_902650705.1 GCA_902650725.1 |
|  | GCA_902650745.1 GCA_902650755.1 GCA_902650765.1 GCA_902650775.1 GCA_902650785.1 |
|  | GCA_902650795.1 GCA_902650815.1 GCA_902650825.1 GCA_902650835.1 GCA_902650845.1 |
|  | GCA_902650855.1 GCA_902650865.1 GCA_902650875.1 GCA_902650885.1 GCA_902650905.1 |
|  | GCA_902650915.1 GCA_902650925.1 GCA_902650945.1 GCA_902650975.1 GCA_902650985.1 |
|  | GCA_902650995.1 GCA_902651015.1 GCA_903856825.1 GCA_016615995.1 GCA_016616015.1 |
|  | GCA_016616045.1 GCA_016616875.1 |
| **Stool Samples** | GCF_002261675.1 GCF_002261735.1 GCF_002261825.1 GCF_002261875.1 GCF_002261975.1 |
|  | GCF_002262035.1 GCF_002262065.1 GCF_002262075.1 GCF_002262135.1 GCF_002262185.1 |
|  | GCF_002262215.1 GCF_002262225.1 GCF_002262235.1 GCF_002262375.1 GCF_002262425.1 |
|  | GCF_002262465.1 GCF_002262475.1 GCF_002262485.1 GCF_002262625.1 GCF_002262675.1 |

Table S2. Characteristics and logistic regression analysis of hypervirulent carbapenem-resistant *Klebsiella pneumoniae* isolated from stool samples of hospitalized patients.

| **Variable** |  | **Value for group** | |  | P valuea |
| --- | --- | --- | --- | --- | --- |
|  |  | hv-CRKP | no hv-CRKP |  |  |
| **No. of patients (%)** |  | 46 (17) | 224 (83) |  |  |
| **sex** |  |  |  |  | 0.1383 |
| No. of male patients (%) |  | 32 (69.5) | 127 (56.7) |  |  |
| No. of female patients (%) |  | 14 (30.5) | 97 (43.3) |  |  |
| **Age** |  | 48.7±19.6 | 45.5±24.3 |  | 0.4125 |
| **No. receiving antibiotic therapy (%)** |  |  |  |  |  |
| Aminoglycosides |  | 1 (0.2) | 8 (3.5) |  | >0.9999 |
| Carbapenemase |  | 7 (15.2) | 53 (23.7) |  | 0.2467 |
| Fluoroquinolones |  | 3 (0.6) | 20 (8.9) |  | 0.7766 |
| β-Lactam/β-lactamase inhibitor combination |  | 15 (32.6) | 82 (36.6) |  | 0.6173 |
| Macrolides |  | 0 (0) | 2 (0.9) |  | >0.9999 |
| Fosfomycin |  | 0 (0) | 0 (0) |  | >0.9999 |
| Sulfamethoxazole |  | 1 (0.2) | 6 (2.7) |  | >0.9999 |
| Colistin |  | 0 (0) | 4 (1.8) |  | >0.9999 |
| Tigecycline |  | 3 (0.6) | 22 (9.8) |  | 0.5885 |
| Vancomycin |  | 1 (0.2) | 24 (10.7) |  | 0.0914 |
| **No. department (%)** |  |  |  |  |  |
| Rehabilitation |  | 7(15.2) | 13 (5.8) |  | 0.0557 |
| ICU |  | 2 (0.4) | 4 (1.8) |  | 0.2715 |
| orthopedics |  | 3 (0.6) | 10 (4.5) |  | 0.4727 |
| hematology |  | 3 (0.6) | 12 (5.3) |  | 0.7274 |
| Oncology |  | 3 (0.6) | 11 (4.9) |  | 0.7143 |
| Pediatrics |  | 3 (0.6) | 28 (12.5) |  | 0.3164 |
| emergency |  | 2 (0.4) | 5 (2.2) |  | 0.3407 |
| Gastroenterology |  | 5(10.8) | 13 (5.8) |  | 0.2037 |
| Respiratory |  | 5(10.8) | 11 (4.9) |  | 0.1612 |
| Cardiovascular |  | 2 (0.4) | 19 (8.4) |  | 0.5453 |
| Gynecology |  | 1 (0.2) | 2 (0.9) |  | 0.4303 |
| Physical examination center |  | 3 (0.6) | 16 (7.1) |  | >0.9999 |
| urology |  | 1 (0.2) | 0 (0) |  | 0.1704 |
| NICU |  | 1 (0.2) | 7 (3.1) |  | >0.9999 |
| stomatology |  | 1 (0.2) | 0 (0) |  | 0.1704 |
| EICU |  | 1 (0.2) | 17 (7.6) |  | 0.3264 |
| General Practice |  | 1 (0.2) | 1 (0.4) |  | 0.3122 |
| nephrology |  | 1 (0.2) | 9 (4.0) |  | >0.9999 |
| Neurosurgery |  | 1 (0.2) | 12 (5.3) |  | 0.7034 |

aUnivariate analysis; categorical variables were compared using a χ2 test.

Table S3. Antimicrobial susceptibility profiles of 46 hypervirulent carbapenem-resistant *Klebsiella pneumoniae* isolated from stool samples of inpatients.

| **Strains** | **ST types** | **MIC (μg/ml)** | | | | | | | | | | | | | | |
| --- | --- | --- | --- | --- | --- | --- | --- | --- | --- | --- | --- | --- | --- | --- | --- | --- |
| **IMP** | **MEM** | **ETP** | **TGC** | **CT** | **CIP** | **GEN** | **AMK** | **CAZ** | **CTX** | **FEP** | **ATM** | **TZP** | **SXT** | **FOS** |
| KP01 | 11 | >32 | >64 | >32 | 4 | 0.25 | >64 | >128 | >128 | >256 | >256 | >256 | >64 | >256 | >8 | 128 |
| KP02 | 11 | >32 | >64 | >32 | 8 | 0.5 | >64 | >128 | >128 | >256 | >256 | 256 | >64 | >256 | >8 | 128 |
| KP03 | 11 | >32 | >64 | >32 | 8 | 0.5 | >64 | >128 | >128 | >256 | >256 | >256 | >64 | >256 | >8 | 128 |
| KP04 | 11 | >32 | >64 | >32 | 8 | 0.25 | >64 | >128 | >128 | >256 | >256 | >256 | >64 | >256 | >8 | 128 |
| KP05 | 11 | >32 | >64 | >32 | 8 | 0.25 | >64 | >128 | >128 | >256 | >256 | >256 | >64 | >256 | >8 | 128 |
| KP06 | 11 | >32 | >64 | >32 | 8 | 0.25 | >64 | >128 | >128 | >256 | >256 | >256 | >64 | >256 | >8 | 128 |
| KP07 | 11 | >32 | >64 | 16 | 0.5 | 0.5 | >64 | >128 | >128 | >256 | >256 | >256 | >64 | >256 | >8 | 16 |
| KP08 | 11 | >32 | >64 | >32 | 8 | 0.25 | >64 | >128 | >128 | >256 | >256 | >256 | >64 | >256 | >8 | 64 |
| KP09 | 11 | >32 | >64 | >32 | 2 | 0.5 | >64 | >128 | >128 | >256 | >256 | >256 | >64 | >256 | >8 | 128 |
| KP10 | 11 | >32 | >64 | >32 | 8 | 0.25 | >64 | >128 | >128 | >256 | >256 | >256 | >64 | >256 | >8 | 128 |
| KP11 | 11 | >32 | >64 | >32 | 4 | 0.25 | >64 | >128 | >128 | >256 | >256 | >256 | >64 | >256 | >8 | 128 |
| KP12 | 11 | >32 | >64 | >32 | 0.25 | 0.25 | >64 | >128 | >128 | >256 | >256 | >256 | >64 | >256 | >8 | 128 |
| KP13 | 11 | >32 | >64 | >32 | 4 | 0.125 | >64 | >128 | >128 | >256 | >256 | >256 | >64 | >256 | >8 | 128 |
| KP14 | 11 | >32 | >64 | >32 | 4 | 0.5 | >64 | >128 | >128 | >256 | >256 | >256 | >64 | >256 | >8 | 128 |
| KP15 | 11 | >32 | >64 | >32 | 4 | 0.5 | >64 | >128 | >128 | >256 | >256 | >256 | >64 | >256 | >8 | 128 |
| KP16 | 11 | >32 | >64 | >32 | 4 | 0.5 | >64 | >128 | >128 | >256 | >256 | >256 | >64 | >256 | >8 | 128 |
| KP17 | 11 | >32 | >64 | >32 | 4 | 0.25 | >64 | >128 | >128 | >256 | >256 | >256 | >64 | >256 | >8 | 128 |
| KP18 | 11 | >32 | >64 | >32 | 4 | 0.25 | >64 | >128 | >128 | >256 | >256 | 256 | >64 | >256 | >8 | 128 |
| KP19 | 11 | >32 | >64 | >32 | 4 | 0.25 | >64 | >128 | >128 | >256 | >256 | >256 | >64 | >256 | >8 | 128 |
| KP20 | 11 | >32 | >64 | >32 | 0.5 | 0.25 | >64 | >128 | >128 | >256 | >256 | >256 | >64 | >256 | >8 | 128 |
| KP21 | 11 | >32 | >64 | >32 | 4 | 0.125 | >64 | >128 | >128 | >256 | >256 | >256 | >64 | >256 | >8 | 128 |
| KP22 | 11 | >32 | >64 | >32 | 4 | 0.25 | >64 | >128 | >128 | >256 | >256 | >256 | >64 | >256 | >8 | 128 |
| KP23 | 11 | >32 | >64 | >32 | 4 | 0.5 | >64 | >128 | >128 | >256 | >256 | >256 | >64 | >256 | >8 | 64 |
| KP24 | 11 | >32 | >64 | >32 | 2 | 0.5 | >64 | >128 | >128 | >256 | >256 | >256 | >64 | >256 | >8 | 64 |
| KP25 | 11 | >32 | >64 | >32 | 4 | 0.25 | >64 | >128 | >128 | >256 | >256 | >256 | >64 | >256 | >8 | 256 |
| KP26 | 11 | >32 | >64 | >32 | 4 | 0.125 | >64 | >128 | >128 | >256 | >256 | >256 | >64 | >256 | >8 | 128 |
| KP27 | 11 | >32 | >64 | >32 | 8 | 0.125 | >64 | >128 | >128 | >256 | >256 | >256 | >64 | >256 | >8 | 64 |
| KP28 | 11 | >32 | >64 | >32 | 2 | 0.25 | >64 | >128 | >128 | >256 | >256 | 256 | >64 | >256 | >8 | 128 |
| KP29 | 11 | >32 | >64 | >32 | 4 | 0.25 | >64 | >128 | >128 | >256 | >256 | >256 | >64 | >256 | >8 | 128 |
| KP30 | 11 | >32 | >64 | >32 | 4 | 0.5 | >64 | >128 | >128 | >256 | >256 | 256 | >64 | >256 | >8 | 128 |
| KP31 | 11 | >32 | >64 | >32 | 4 | 0.5 | >64 | >128 | >128 | >256 | >256 | 256 | >64 | >256 | >8 | 128 |
| KP32 | 11 | >32 | >64 | >32 | 4 | 0.25 | >64 | >128 | >128 | >256 | >256 | 256 | >64 | >256 | >8 | 128 |
| KP33 | 11 | >32 | >64 | >32 | 4 | 0.25 | >64 | >128 | >128 | >256 | >256 | >256 | >64 | >256 | >8 | 128 |
| KP34 | 11 | >32 | >64 | >32 | 4 | 0.125 | >64 | >128 | >128 | >256 | >256 | 256 | >64 | >256 | >8 | 128 |
| KP35 | 11 | >32 | >64 | >32 | 4 | 0.125 | >64 | >128 | >128 | >256 | >256 | >256 | >64 | >256 | >8 | 128 |
| KP36 | 11 | >32 | >64 | >32 | 4 | 0.25 | >64 | >128 | >128 | >256 | >256 | 256 | >64 | >256 | >8 | 128 |
| KP37 | 11 | >32 | >64 | >32 | 4 | 0.25 | >64 | >128 | >128 | >256 | >256 | 256 | >64 | >256 | >8 | 64 |
| KP38 | 11 | >32 | >64 | >32 | 4 | 0.25 | >64 | >128 | >128 | >256 | >256 | >256 | >64 | >256 | >8 | 128 |
| KP39 | 11 | >32 | >64 | >32 | 4 | 0.25 | >64 | >128 | >128 | >256 | >256 | >256 | >64 | >256 | >8 | 128 |
| KP40 | 11 | >32 | >64 | >32 | 4 | 0.25 | >64 | >128 | >128 | >256 | >256 | 256 | >64 | >256 | >8 | 128 |
| KP41 | 23 | >32 | >64 | >32 | 4 | 0.25 | ＜0.5 | ＜0.5 | ＜1 | >256 | >256 | 256 | >64 | >256 | ＜0.5 | 64 |
| KP42 | 11 | >32 | >64 | >32 | 8 | 4 | >64 | >128 | >128 | >256 | >256 | 256 | >64 | >256 | >8 | 64 |
| KP43 | 11 | >32 | >64 | >32 | 4 | 0.5 | >64 | >128 | >128 | >256 | >256 | 256 | >64 | >256 | >8 | 128 |
| KP44 | 11 | >32 | >64 | >32 | 4 | 0.5 | >64 | >128 | >128 | >256 | >256 | 256 | >64 | >256 | >8 | 128 |
| KP45 | 11 | >32 | >64 | >32 | 8 | 4 | >64 | >128 | >128 | >256 | >256 | 256 | >64 | >256 | >8 | 128 |
| KP46 | 11 | >32 | >64 | >32 | 8 | 1 | >64 | >128 | >128 | >256 | >256 | 256 | >64 | >256 | >8 | 128 |

TGC：tigecycline；IMP：imipenem；MEM：meropenem；ETP：ertapenem；CAZ：ceftazidime；CTX：cefotaxime；FEP：cefepime；ATM:aztreonam；CT：colistin；CIP：ciprofloxacin；AMK：amikacin；TZP：piperacillin/tazobactam；SXT：sulfamethoxazole/trimethoprim；FOS：fosfomycin

MIC value of antibiotic resistance (μg/ml). TGC ≥8; IMP ≥4; MEM ≥4; ETP ≥2; CAZ ≥16; CTX ≥4; FEP ≥16; ATM ≥16; CT ≥4; CIP ≥1; GEN ≥16; AMK ≥64; TZP ≥128; SXT ≥4; FOS ≥256.

Table S4. Univariate analysis of accessory genomes of gut colonizing and pathogenic populations of hypervirulent carbapenem-resistant *Klebsiella pneumoniae.*

| **COGs** |  | **Value for group** | | P valuea |
| --- | --- | --- | --- | --- |
|  |  | infection | colonized |  |
| No.of genes |  | 159 | 64 |  |
|  |  |  |  |  |
| [L] Replication, recombination and repair |  | 38 | 8 | 0.0676 |
| [K] Transcription |  | 12 | 6 | 0.7861 |
| [V] Defense mechanisms |  | 11 | 3 | 0.7618 |
| [C] Energy production and conversion |  | 6 | 2 | >0.9999 |
| [G] Carbohydrate transport and metabolism |  | 6 | 2 | >0.9999 |
| [U] Intracellular trafficking, secretion, and vesicular transport |  | 5 | 3 | 0.6922 |
| [P] Inorganic ion transport and metabolism |  | 5 | 4 | 0.2821 |
| [O] Posttranslational modification, protein turnover, chaperones |  | 4 | 3 | 0.4123 |
| [D] Cell cycle control, cell division, chromosome partitioning |  | 3 | 1 | >0.9999 |
| [M] Cell wall/membrane/envelope biogenesis |  | 3 | 2 | 0.6265 |
| [E] Amino acid transport and metabolism |  | 3 | 0 | 0.5591 |
| [J] Translation, ribosomal structure and biogenesis |  | 2 | 2 | 0.3249 |
| [H] Coenzyme transport and metabolism |  | 1 | 0 | >0.9999 |
| [I] Lipid transport and metabolism |  | 1 | 0 | >0.9999 |
| [Q] Secondary metabolites biosynthesis, transport and catabolism |  | 1 | 0 | >0.9999 |
| [T] Signal transduction mechanisms |  | 0 | 2 | 0.0814 |

**Supplementary figures**

**Figure S1.** ST11 hv-CRKP was the predominant strain in the clinical infection population in China

**Figure S2**. The virulence and drug resistance gene profiles of 652 ST11 hv-CRKP strains.

Gut-colonized strains (orange) and pathogenic strains (indigo) are distinguished by different colors.

**Figure S3.** Comparison of virulence plasmid replicon carriage between gut-colonized ST11 hv-CRKP and pathogenic ST11 hv-CRKP

**Figure S4.** Plasmid replicon carried by gut colonized hv-CRKP collected at Sun Yat-sen Memorial Hospital.

Strain number is shown on the horizontal axis and plasmid replicon type is shown on the vertical axis.

**Figure S5.** Structural features of antibiotic resistance plasmids derived from gut colonized hv-CRKP.

(A) The antibiotic-resistant plasmid harbored by KP41. (B, C) The antibiotic-resistant plasmid harbored by KP01.

Resistance genes are represented in red; horizontal transfer elements are represented in purple; and other genes are represented in black.


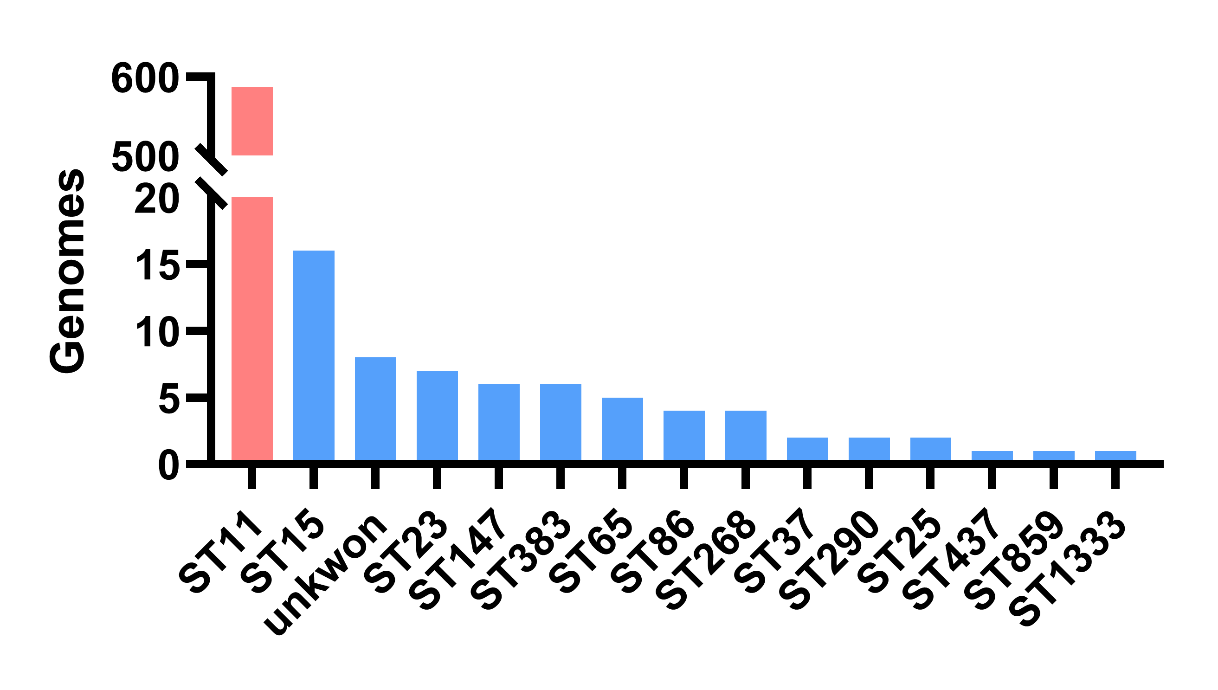


**Figure S1.** ST11 hv-CRKP was the predominant strain in the clinical infection population in China


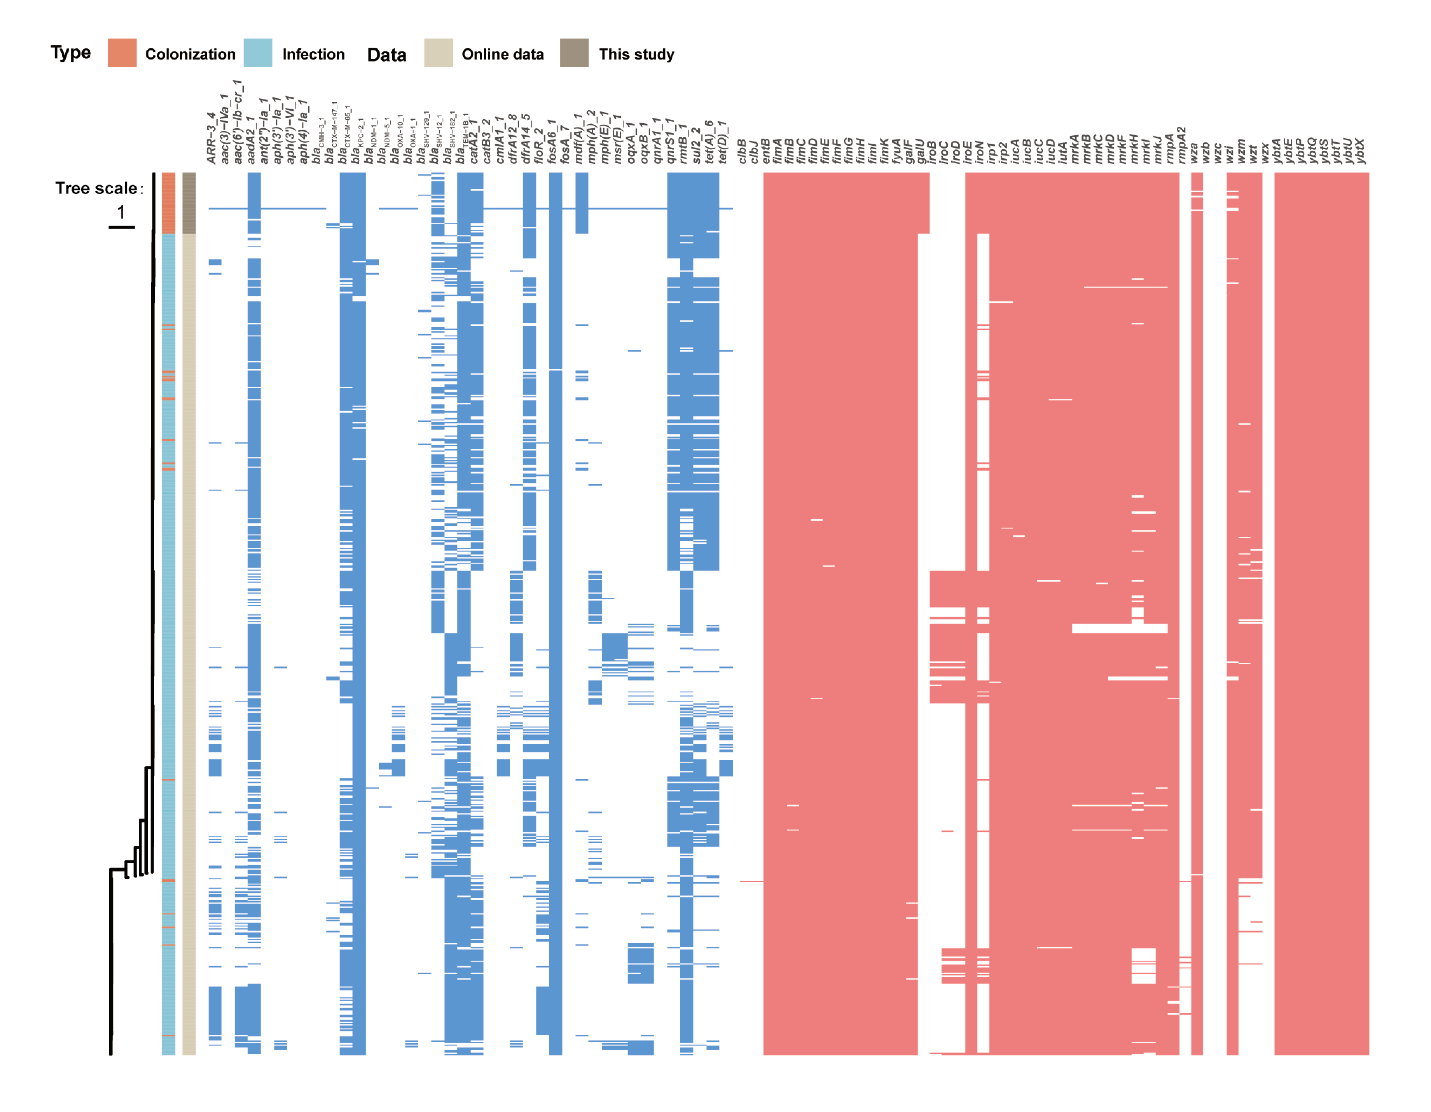


**Figure S2**. The virulence and drug resistance gene profiles of 652 ST11 hv-CRKP strains.

Gut-colonized strains (orange) and pathogenic strains (indigo) are distinguished by different colors.

**
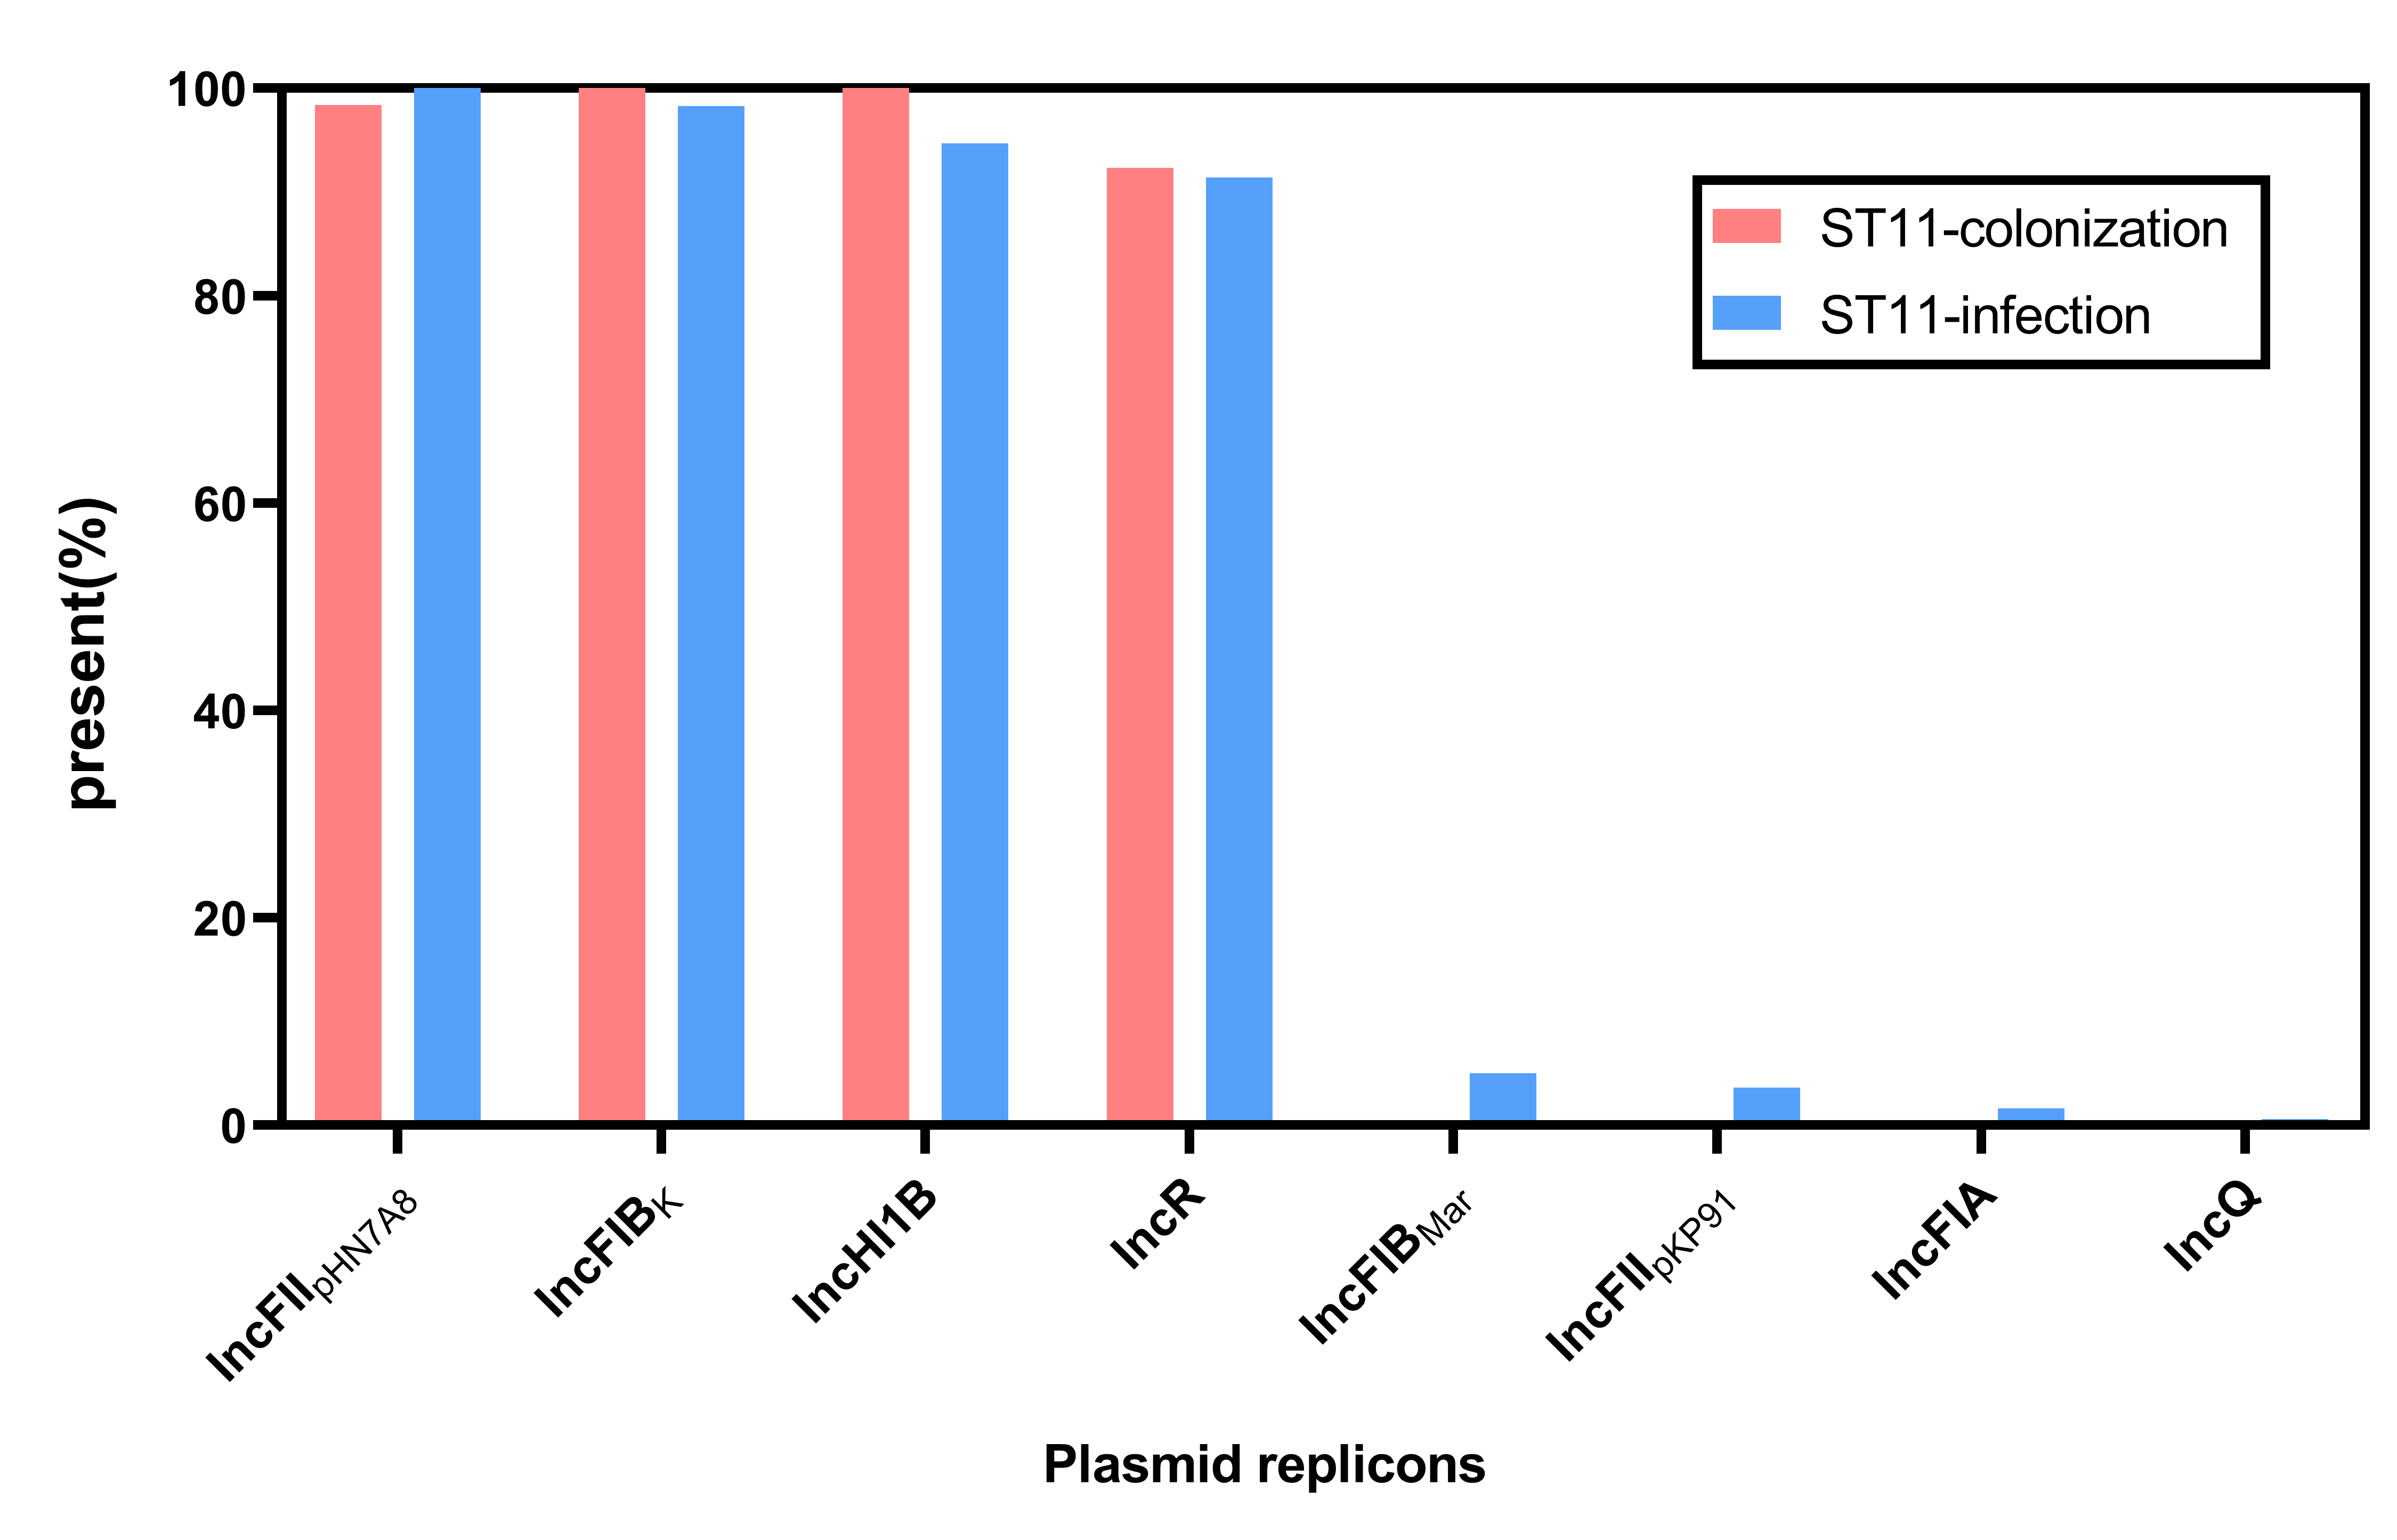
**

**Figure S3.** Comparison of virulence plasmid replicon carriage between gut colonized ST11 hv-CRKP and pathogenic ST11 hv-CRKP.

**Note**: Adapted from Du P, Liu C, Fan S, et al. The role of plasmid and resistance gene acquisition in the emergence of ST23 multi-drug resistant, hypervirulent Klebsiella pneumoniae. Microbiol Spectr. 2022;10(2):e0192921. Creative Commons.31

**
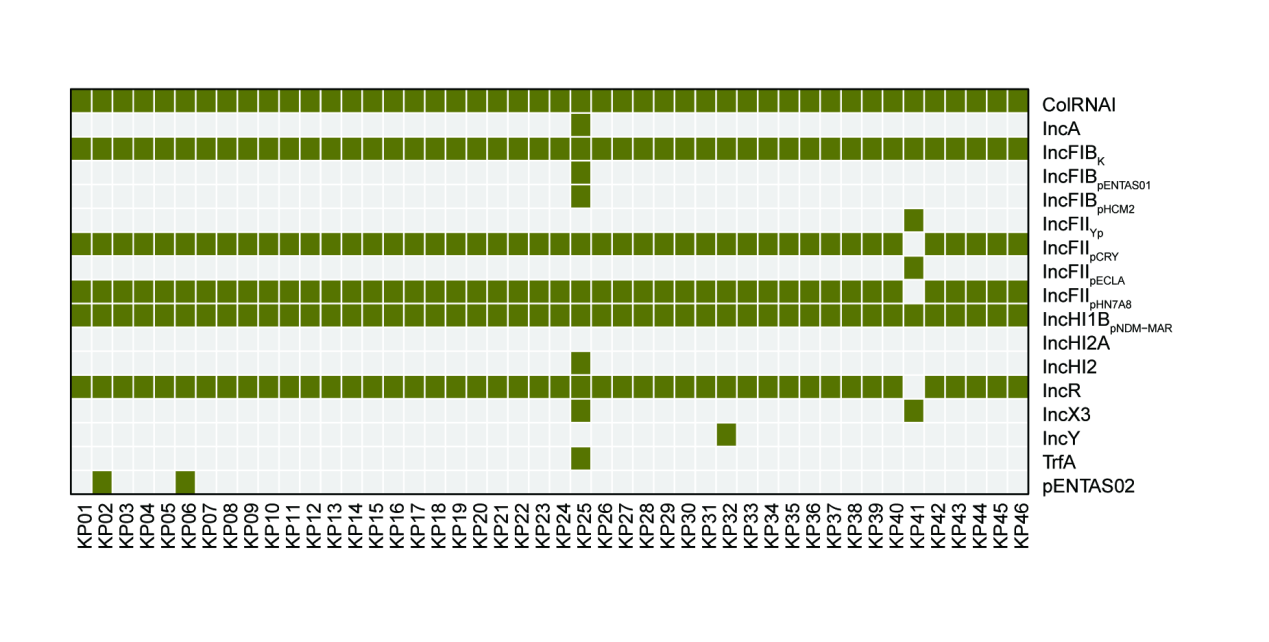
**

**Figure S4.** Plasmid replicon carried by gut colonized hv-CRKP collected at Sun Yat-sen Memorial Hospital.

Strain number is shown on the horizontal axis and plasmid replicon type is shown on the vertical axis.


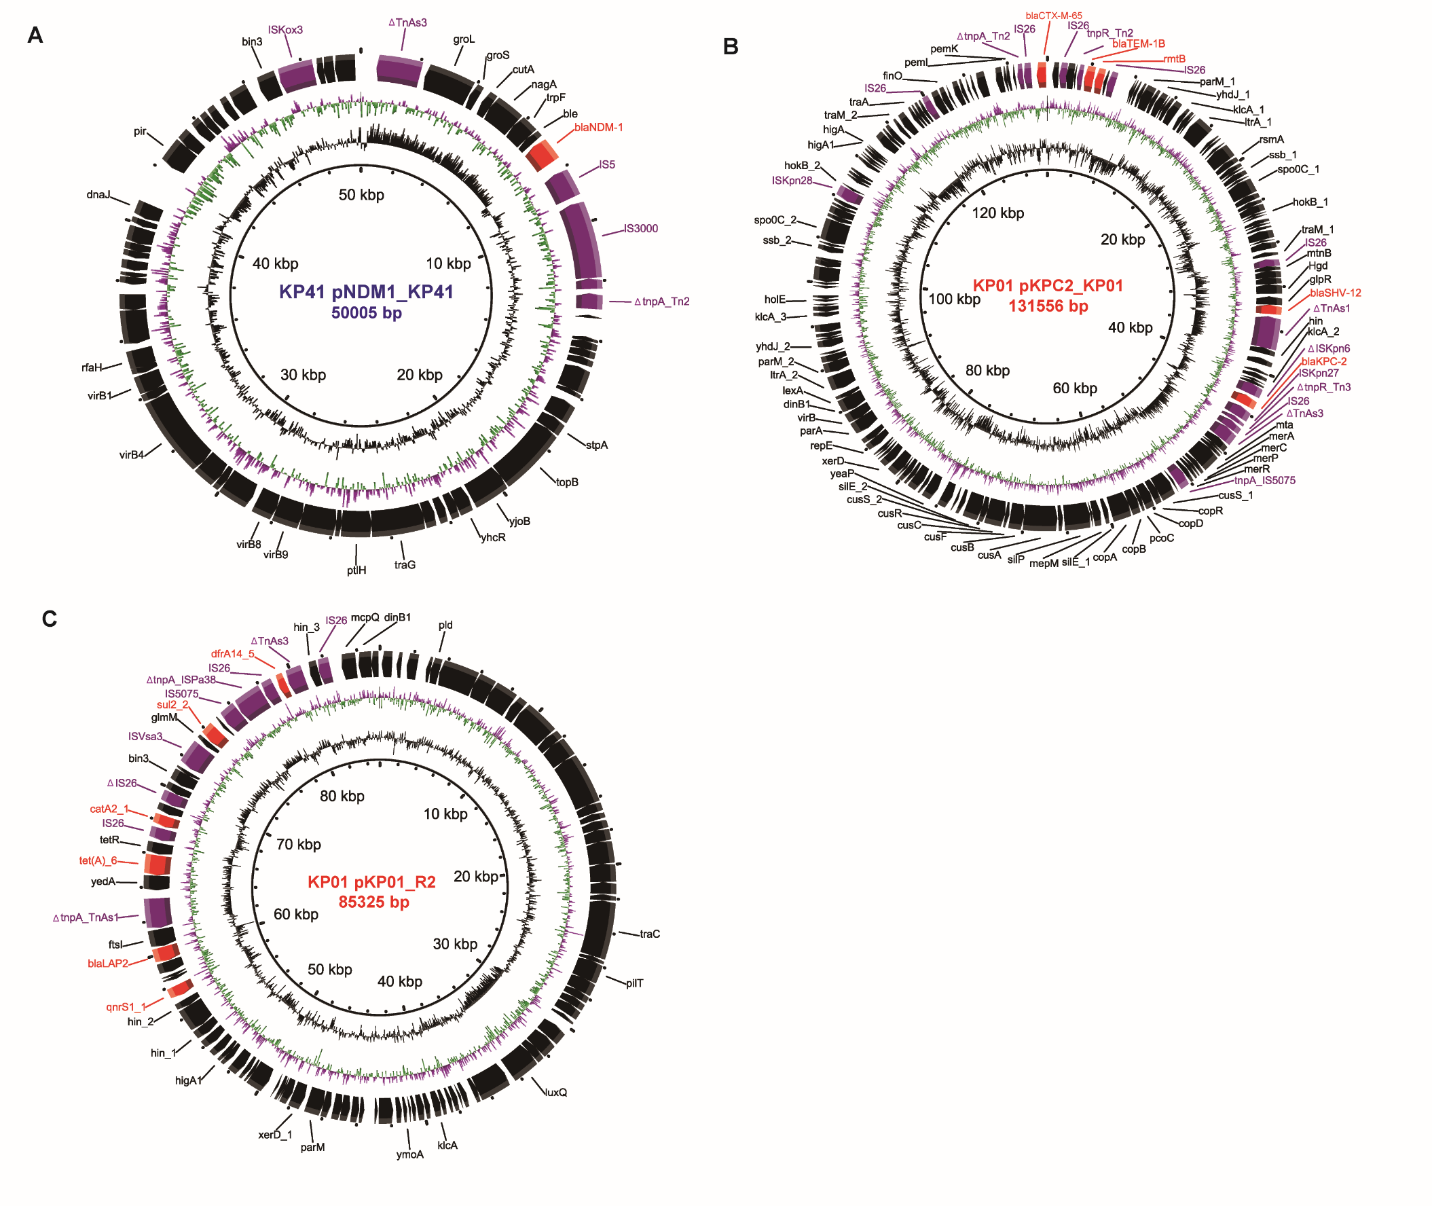


**Figure S5.** Structural features of the antibiotic resistance plasmids derived from gut colonized hv-CRKP.

(A) The antibiotic-resistant plasmid harbored by KP41. (B, C) The antibiotic-resistant plasmid harbored by KP01.

Resistance genes are represented in red; horizontal transfer elements are represented in purple; and other genes are represented in black.
